# Supplementary material for: New Diagnostic and Prognostic Models for the Development of Alcoholic Cirrhosis Based on Genetic Predisposition and Alcohol History
Source: Preprints.org preprint supplement (doi:10.20944/preprints202307.0293.v1), 2023-07-05

**Supplementary figure 1:** association between rs738409 PNPLA3 and rs72613567 HSD17B13 presence and liver cirrhosis development over time.

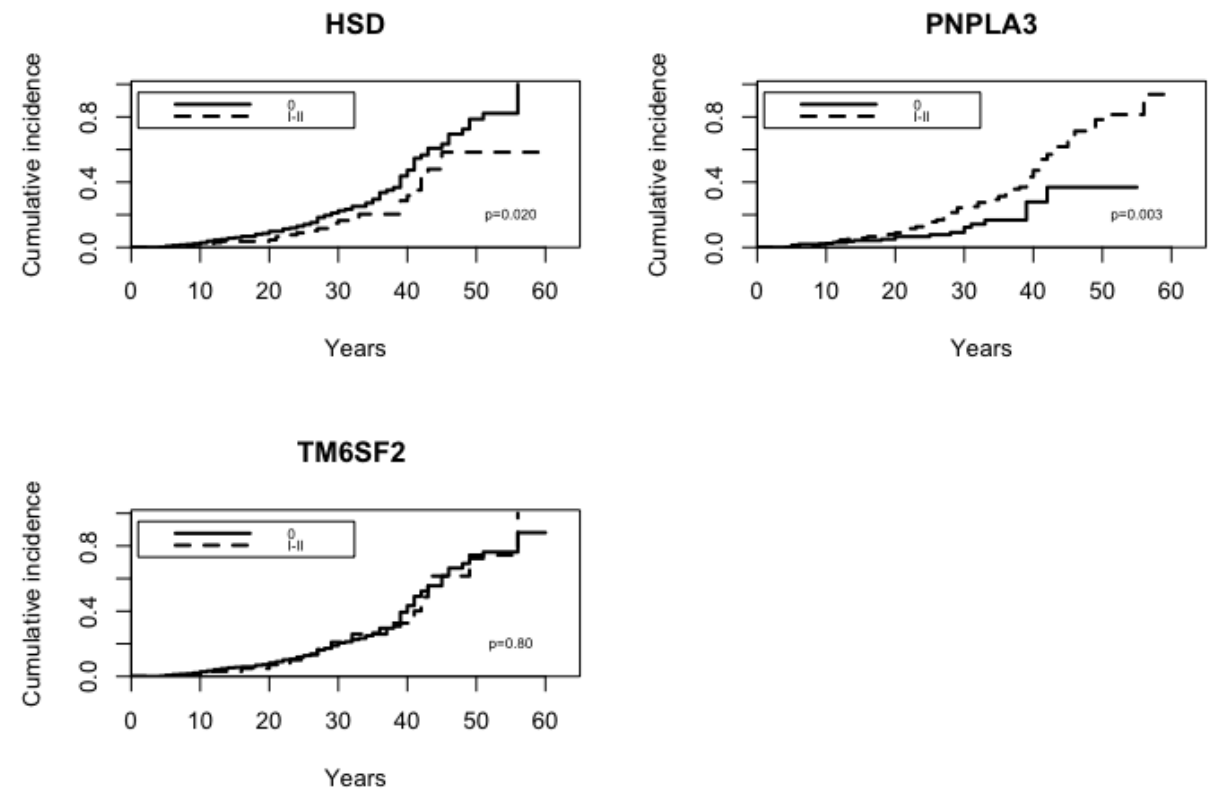

Supplement: Supplementary file 1 [file supplementary]
